# Supplementary material for: A Validation Study of the German Complex-Span Tasks and Some General Considerations on Task Translation Procedures in Cognitive Psychology
Source: Atypon-hosted journal article supplement (doi:10.1027/1015-5759/a000444), 2017-12-15
Supplement: 1015-5759_a000444_esm1.pdf [file 1015-5759_a000444_esm1.pdf]

**Supplement A. List of Supplements.**

| Supplement | Content                                                                                    |
|------------|--------------------------------------------------------------------------------------------|
| A          | List of supplements with descriptions                                                      |
| B          | Factor loadings for WMC factor and correlation with gCA using CFA (input and output files) |
| C          | Measurement invariance tests using multi-group CFA (input and output files)                |
| D          | Test for measurement invariance using BSEM (input and output files)                        |
| E          | Parameter estimates of all the invariance tests                                            |
| F          | Comparison of reliabilities between language groups (input and output files)               |
| G          | Comparison of WMC–reasoning correlation between language groups (input and output files)   |

---

*Note.* WMC = working memory capacity; gCA = general cognitive abilities; CFA = confirmatory factor analysis; BSEM = Bayesian structural equation modeling.

Please note that we used the following variable names in all data files:

*Ospan* = operation span task

*Rspan* = reading span task

*SSpan* = symmetry span task

*RLSpan* = running memory span task

*Raven* = reasoning test

*Raven\_even18\_mean* = mean of all even test items of the reasoning test

*Raven\_odd18\_mean* = mean of all odd test items of the reasoning test
