# Supplementary material for: A Validation Study of the German Complex-Span Tasks and Some General Considerations on Task Translation Procedures in Cognitive Psychology
Source: Atypon-hosted journal article supplement (doi:10.1027/1015-5759/a000444), 2017-12-15
Supplement: 1015-5759_a000444_esm7.pdf [file 1015-5759_a000444_esm7.pdf]

**Supplement E. Parameter estimates of the measurement invariance tests.**

Table E1. Unstandardized model parameters of the configural invariance model

|         | Factor Loadings |        | Variances |       | Residuals |        | Means |       | Intercepts |        |
|---------|-----------------|--------|-----------|-------|-----------|--------|-------|-------|------------|--------|
|         | NA              | GER    | NA        | GER   | NA        | GER    | NA    | GER   | NA         | GER    |
| OSpan   | 6.327           | 9.891  | 1.000     | 1.000 | 70.972    | 68.642 | 0.000 | 0.000 | 60.442     | 58.038 |
| RSpan   | 11.250          | 13.695 | 1.000     | 1.000 | 54.675    | 21.993 | 0.000 | 0.000 | 54.410     | 54.724 |
| SymSpan | 2.958           | 5.190  | 1.000     | 1.000 | 32.242    | 30.499 | 0.000 | 0.000 | 27.100     | 28.610 |

*Note.* OSpan = operation span; RSpan = reading span; SymSpan = symmetry span; NA = North American; GER = German. *CFI* = 1.000, *RMSEA* = .000, *SRMR* = .000, *N* = 205.

Table E2. Unstandardized model parameters of the metric invariance model

|         | Factor Loadings |        | Variances |       | Residuals |        | Means |       | Intercepts |        |
|---------|-----------------|--------|-----------|-------|-----------|--------|-------|-------|------------|--------|
|         | NA              | GER    | NA        | GER   | NA        | GER    | NA    | GER   | NA         | GER    |
| OSpan   | 9.693           | 9.693  | 0.498     | 1.000 | 64.999    | 71.577 | 0.000 | 0.000 | 60.434     | 58.038 |
| RSpan   | 13.966          | 13.966 | 0.498     | 1.000 | 78.476    | 15.563 | 0.000 | 0.000 | 54.410     | 54.724 |
| SymSpan | 4.931           | 4.931  | 0.498     | 1.000 | 30.645    | 31.393 | 0.000 | 0.000 | 27.100     | 28.610 |

*Note.* OSpan = operation span; RSpan = reading span; SymSpan = symmetry span; NA = North American; GER = German. *CFI* = 1.000, *RMSEA* = .000, *SRMR* = .038, *N* = 205.

Table E3. Unstandardized model parameters of the scalar invariance model

|         | Factor Loadings |        | Variances |       | Residuals |        | Means  |       | Intercepts |        |
|---------|-----------------|--------|-----------|-------|-----------|--------|--------|-------|------------|--------|
|         | NA              | GER    | NA        | GER   | NA        | GER    | NA     | GER   | NA         | GER    |
| OSpan   | 9.559           | 9.559  | 0.499     | 1.000 | 67.842    | 75.272 | -0.003 | 0.000 | 59.252     | 59.252 |
| RSpan   | 14.110          | 14.110 | 0.499     | 1.000 | 76.360    | 11.226 | -0.003 | 0.000 | 54.690     | 54.690 |
| SymSpan | 4.880           | 4.880  | 0.499     | 1.000 | 31.386    | 32.495 | -0.003 | 0.000 | 27.867     | 27.867 |

*Note.* OSpan = operation span; RSpan = reading span; SymSpan = symmetry span; NA = North American; GER = German. *RMSEA* = .111, *CFI* = .971, *SRMR* = .058, *N* = 205.
